# Supplementary material
Source: PubMed Central journal article supplement (PMC3058254)
Supplement: NIHMS225366-supplement-1.pdf [file NIHMS225366-supplement-1.pdf]

## Supplementary Information Titles

**Journal:** Nature Medicine

|                       |                                                                           |
|-----------------------|---------------------------------------------------------------------------|
| Article Title:        | C-type lectin SIGNR1-mediated oral tolerance to food systemic anaphylaxis |
| Corresponding Author: | Shau-Ku Huang                                                             |

| Supplementary Item & Number | Title or Caption                                                  |
|-----------------------------|-------------------------------------------------------------------|
| Supplementary Figure 1      | An example of mannosylating BSA                                   |
| Supplementary Figure 2      | Vascular leakage                                                  |
| Supplementary Figure 3      | Flow cytometric analysis of Tregs                                 |
| Supplementary Figure 4      | Flow cytometric analysis of surface markers on LPDCs              |
| Supplementary Figure 5      | Flow cytometric analysis of CLR expression on LPDCs               |
| Supplementary Figure 6      | Western blot analysis of Man <sub>51</sub> -BSA-induced signaling |
| Supplementary Methods       | -                                                                 |
